# Supplementary material for: Tunable ferromagnetic ordering in MoS2 nanosheets with fluorine adsorption
Source: Royal Society of Chemistry journal article supplement (doi:10.1039/c5nr00409h), 2015-01-01
Supplement: c5nr00409h1.pdf [file c5nr00409h1.pdf]

## Supplementary Information

# Tunable Ferromagnetic Ordering in MoS<sub>2</sub> nanosheets with Fluorine Adsorption

Daqiang Gao, Shoupeng Shi, Kun Tao, Baorui Xia and Desheng Xue\*

Figure S1: Primitive M-H curves for the F-MoS<sub>2</sub> nanosheets.

Figure S2: The magnetic hysteresis loops measured in the low field range for the F-MoS<sub>2</sub> nanosheets.

Figure S3: M-H curves for the precursor of NH<sub>4</sub>F and MoS<sub>2</sub> powder.

Figure S4. Magnetization curves (M-H) of the fluorination-MoS<sub>2</sub> nanosheets measured at different temperatures (350~950 K).

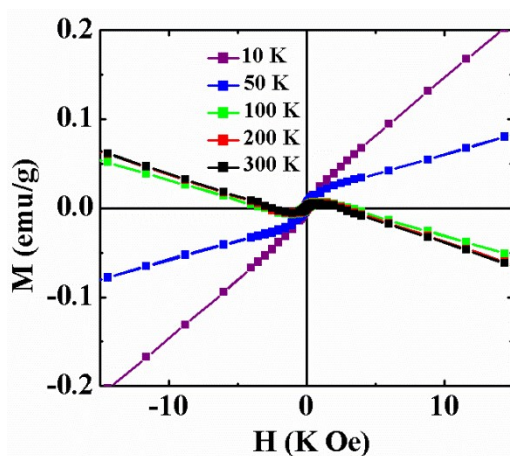

Figure S1: Primitive M-H curves for the F-MoS<sub>2</sub> nanosheets. Results indicate there are ferromagnetism, paramagnetism and diamagnetism co-existent in the sample. Besides the ferromagnetism signal, the paramagnetism dominate at the low temperature while the diamagnetism dominate at the high temperature.

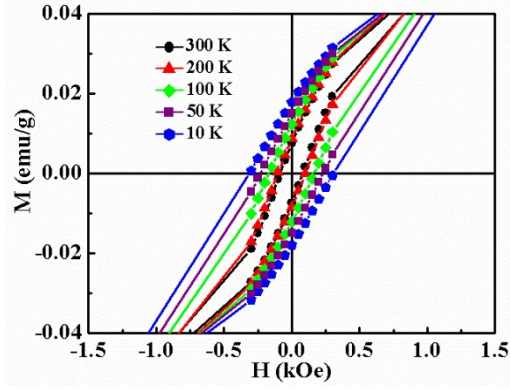

Figure S2: The magnetic hysteresis loops measured in the low field range for the F-MoS<sub>2</sub> nanosheets.

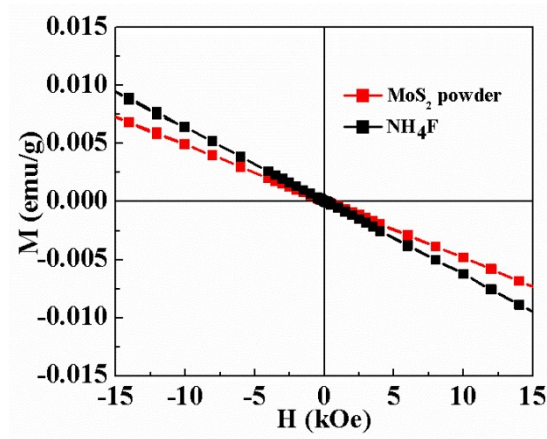

Figure S3: M-H curves for the precursor of NH<sub>4</sub>F and MoS<sub>2</sub> powder.

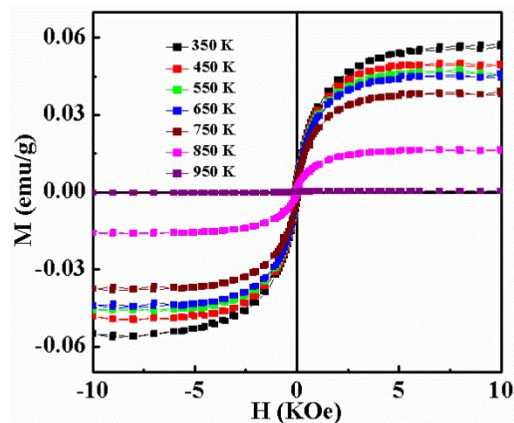

Figure S4. Magnetization curves (M-H) of the fluorination-MoS<sub>2</sub> nanosheets measured at different temperatures (350–950 K), where the diamagnetic background have been subtracted.
